# Supplementary material for: Tumor microenvironment-responsive multifunctional peptide coated ultrasmall gold nanoparticles and their application in cancer radiotherapy
Source: PubMed Central journal article supplement (PMC7196283; doi:10.7150/thno.45017), 2020-04-06
Supplement: thnov10p5195s1.pdf [file thnov10p5195s1.pdf]

## Supporting Information

### **Tumor microenvironment-responsive multifunctional peptide coated ultrasmall gold nanoparticles and their application in cancer radiotherapy**

Yuan Ding<sup>1,3,4,5,6#</sup>, Zhongquan Sun<sup>1,3,4,5,6#</sup>, Zongrui Tong<sup>2,3#</sup>, Sitong Zhang<sup>1,3,4,5,6</sup>, Jie Min<sup>1,3,4,5,6,8</sup>, Qianhui Xu<sup>1,3,4,5,6</sup>, Liuzhi Zhou<sup>1,3,4,5,6</sup>, Zhengwei Mao<sup>2,3\*</sup>, Haibing Xia<sup>7\*</sup>, Weilin Wang<sup>1,3,4,5\*</sup>

<sup>1</sup> Department of Hepatobiliary and Pancreatic Surgery, the Second Affiliated Hospital, Zhejiang University School of Medicine, Hangzhou, Zhejiang 310009;

<sup>2</sup> MOE Key Laboratory of Macromolecular Synthesis and Functionalization, Department of Polymer Science and Engineering, Zhejiang University, Hangzhou 310027, China

<sup>3</sup> Key Laboratory of Precision Diagnosis and Treatment for Hepatobiliary and Pancreatic Tumor of Zhejiang Province, Hangzhou, Zhejiang 310009;

<sup>4</sup> Research Center of Diagnosis and Treatment Technology for Hepatocellular Carcinoma of Zhejiang Province, Clinical Research Center of Hepatobiliary and Pancreatic Diseases of Zhejiang Province, Hangzhou, Zhejiang 310009.

<sup>5</sup> Clinical Medicine Innovation Center of Precision Diagnosis and Treatment for Hepatobiliary and Pancreatic Disease of Zhejiang University, Hangzhou, Zhejiang;

<sup>6</sup> Clinical Research Center of Hepatobiliary and Pancreatic Diseases of Zhejiang Province, Hangzhou, Zhejiang 310009;

<sup>7</sup> State Key Laboratory of Crystal Materials, Shandong University, Jinan 250100;

<sup>8</sup> Department of Hepatobiliary and Pancreatic Surgery, the First Hospital of Jiaxing, Jiaxing, Zhejiang 330440.

# These authors contribute equally.

\* Corresponding authors: wam@zju.edu.cn (W. W.); zwmao@zju.edu.cn (Z.

M.); [hbxia@sdu.edu.cn](mailto:hbxia@sdu.edu.cn) (H. X.).

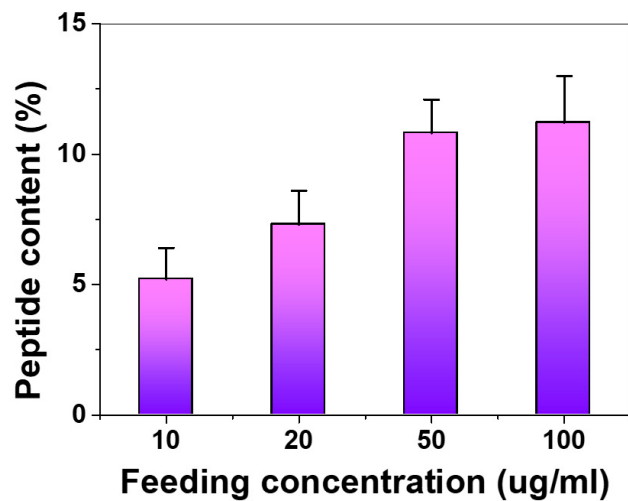

**Figure S1.** Peptide content on ultrasmall Au NPs surface as a function of the Tat-R-EK peptide feeding concentration. The concentration of Au NPs was 100  $\mu\text{g/mL}$ .

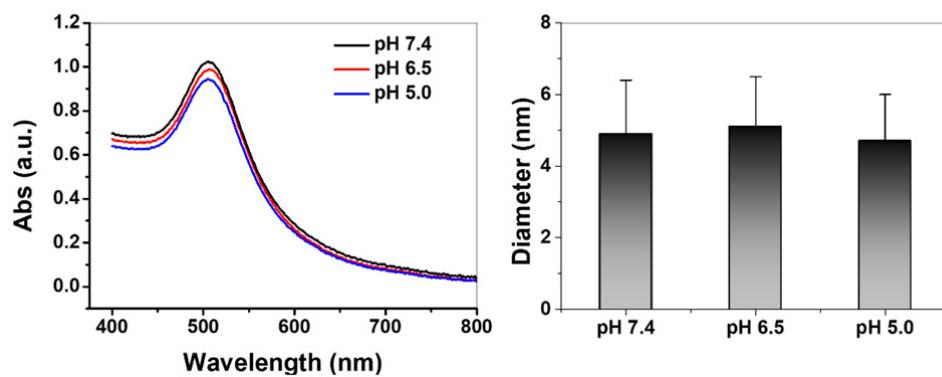

**Figure S2.** UV-vis spectra and hydrodynamic diameters of ultrasmall Au@Tat-R-EK NPs under different pH in PBS.

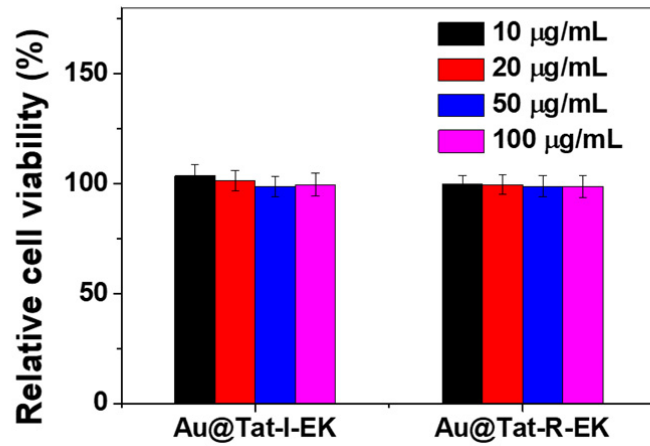

**Figure S3.** Relative cell viability of LM3 cells treated with ultrasmall Au NPs at various concentrations for 24 h. The untreated cells were used as control.

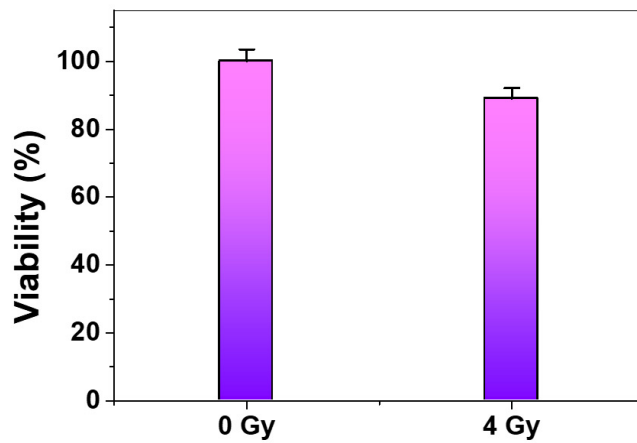

**Figure S4.** Relative cell viability of untreated LM3 cells (0 Gy) and cells received X-ray (4 Gy) alone.

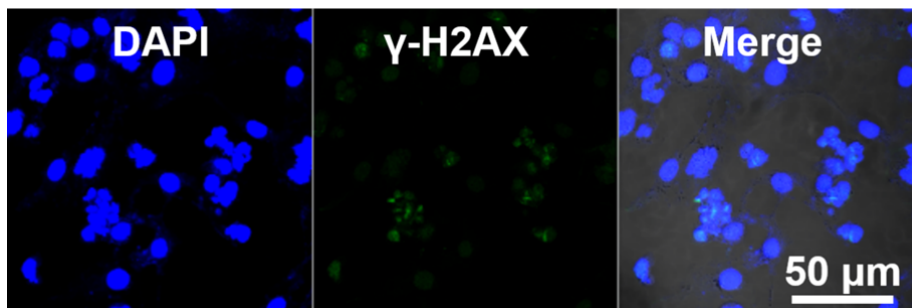

**Figure S5.**  $\gamma$ -H2AX immunofluorescence of LM3 cells treated with Au@Tat-R-EK NPs + GM6001, and 4 Gy radiation.

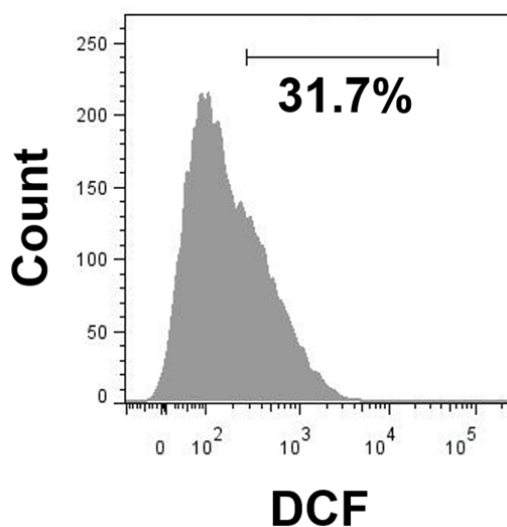

**Figure S6.** Flowcytometry based apoptosis analysis of LM3 cells treated with Au@Tat-R-EK + GM6001 + 4 Gy.

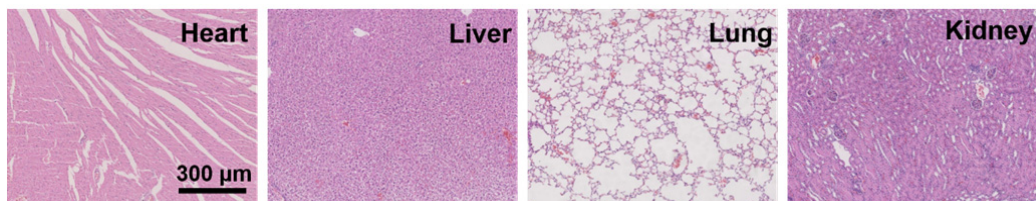

**Figure S7.** Representative images of H&E stained major organs from mice treated with Au@Tat-I-EK NPs (50 mg/kg).

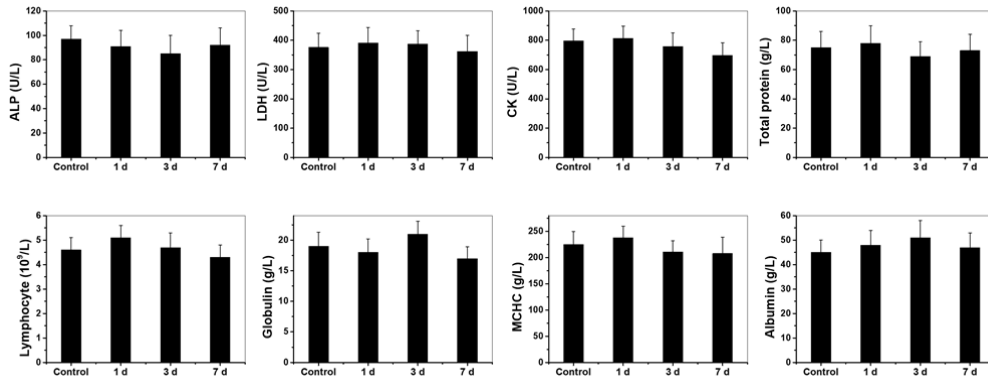

**Figure S8.** A part of blood test results of mice received Au@Tat-R-EK NPs i.v. injection once (n=4).

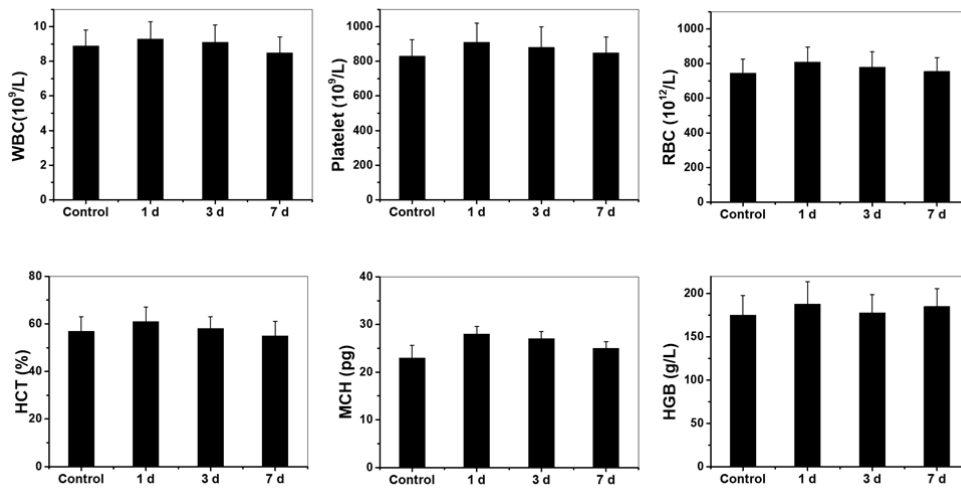

**Figure S9.** Another part of blood test results of mice received Au@Tat-R-EK NPs i.v. injection once (n=4).

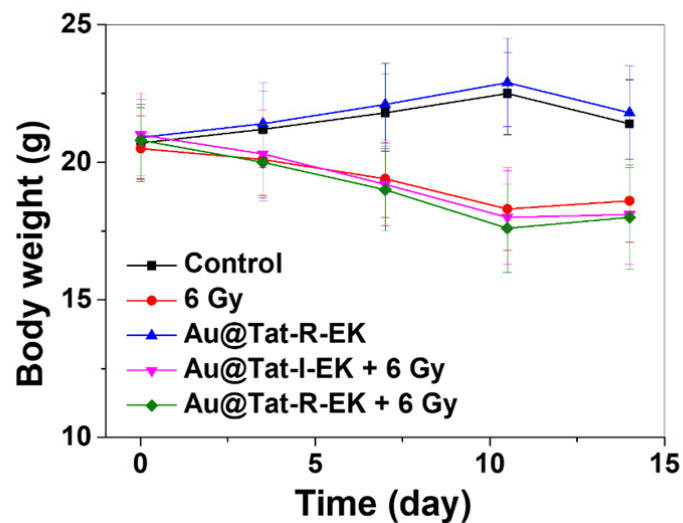

**Figure S10.** Body weight changes of the LM3 tumor-bearing mice treated with different formulations.

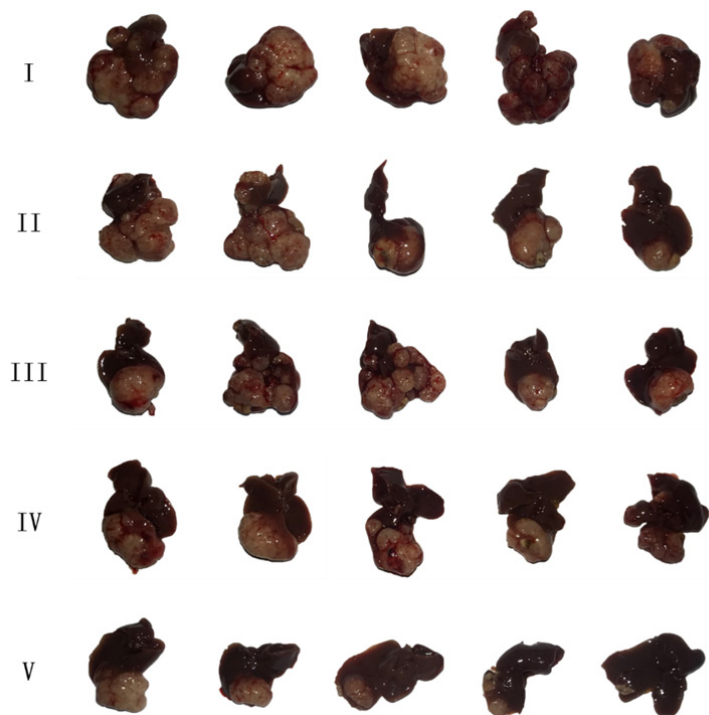

**Figure S11.** Photos of liver tumors after surgical excision. I: Control; II: 4 Gy; III: Au@Tat-R-EK; IV: Au@Tat-I-EK + 4 Gy; V: Au@Tat-R-EK + 4 Gy.
